# Supplementary material for: Chemical trends in the optical properties of rocksalt nanoparticles
Source: Royal Society of Chemistry journal article supplement (doi:10.1039/c5cp04851f), 2015-01-01
Supplement: c5cp04851f1.pdf [file c5cp04851f1.pdf]

Electronic supplementary information for:

## Chemical trends in the optical properties of rocksalt nanoparticles

Milena C. C. Wobbe<sup>1</sup>, and Martijn A. Zwijnenburg<sup>1,\*</sup>

<sup>1</sup> Department of Chemistry, University College London, 20 Gordon Street, London WC1H 0AJ, U.K.

\* Email: m.zwijnenburg@ucl.ac.uk.

### ESI-1 structural data

**Table S1** Distances between corner ions on the same face, given in Å, as calculated for structures optimised using BHLYP.

| BHLYP                | MgO  | CaO   | SrO   | MgS   | MgSe  | CdO  |
|----------------------|------|-------|-------|-------|-------|------|
| M-X corner to corner | 5.87 | 6.76  | 7.24  | 7.29  | 7.68  | 6.52 |
| X-X diagonal         | 8.42 | 9.523 | 10.13 | 10.69 | 11.32 | 9.28 |
| M-M diagonal         | 8.17 | 9.59  | 10.34 | 9.89  | 10.35 | 9.16 |

**Table S2** Distances between corner ions on the same face, given in Å, as calculated for structures optimised using the B3LYP.

| B3LYP                | MgO  | CaO  | SrO   | MgS   | MgSe  | CdO  |
|----------------------|------|------|-------|-------|-------|------|
| M-X corner to corner | 5.93 | 6.79 | 7.29  | 7.33  | 7.73  | 6.60 |
| X-X diagonal         | 8.52 | 9.57 | 10.20 | 10.77 | 11.40 | 9.41 |
| M-M diagonal         | 8.26 | 9.64 | 10.41 | 9.94  | 10.41 | 9.26 |

From the data of table S1 and S2, it can be seen that the clusters are increasing in size as the ions become heavier. For the cases that the cation (M) are larger than the anion (X), the M-M distance across the face is larger than the X-X distance and vice versa.

### ESI-2 Spectra

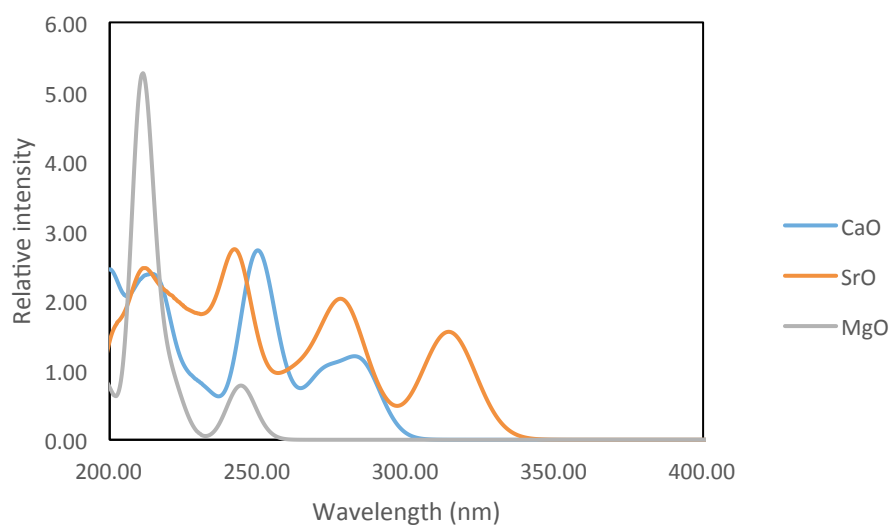

**Fig. S1** Unshifted TD-B3LYP spectra for the  $(MgO)_{32}$ ,  $(CaO)_{32}$  and  $(SrO)_{32}$  nanoparticles.

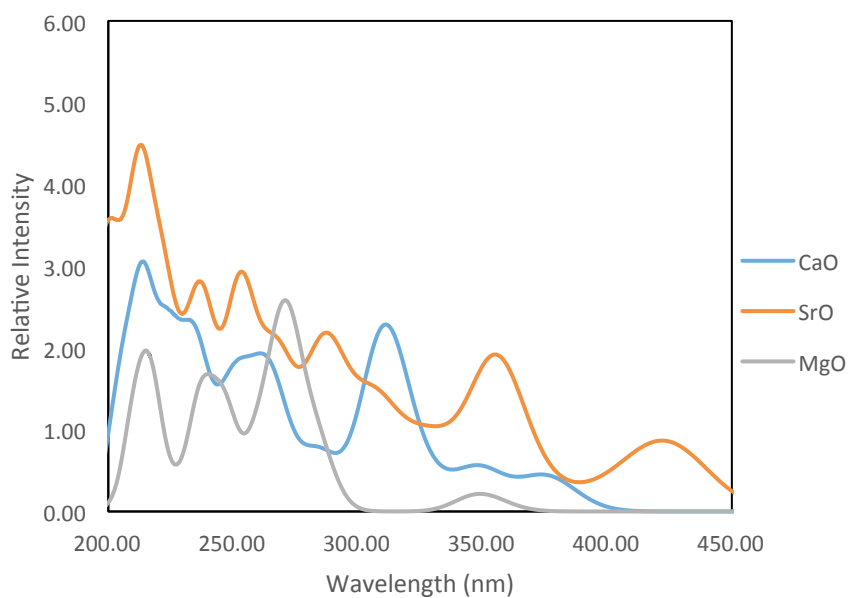

**Fig. S2** TD-B3LYP spectra for the  $(MgO)_{32}$ ,  $(CaO)_{32}$  and  $(SrO)_{32}$  nanoparticles.

### ESI-3 Density Differences

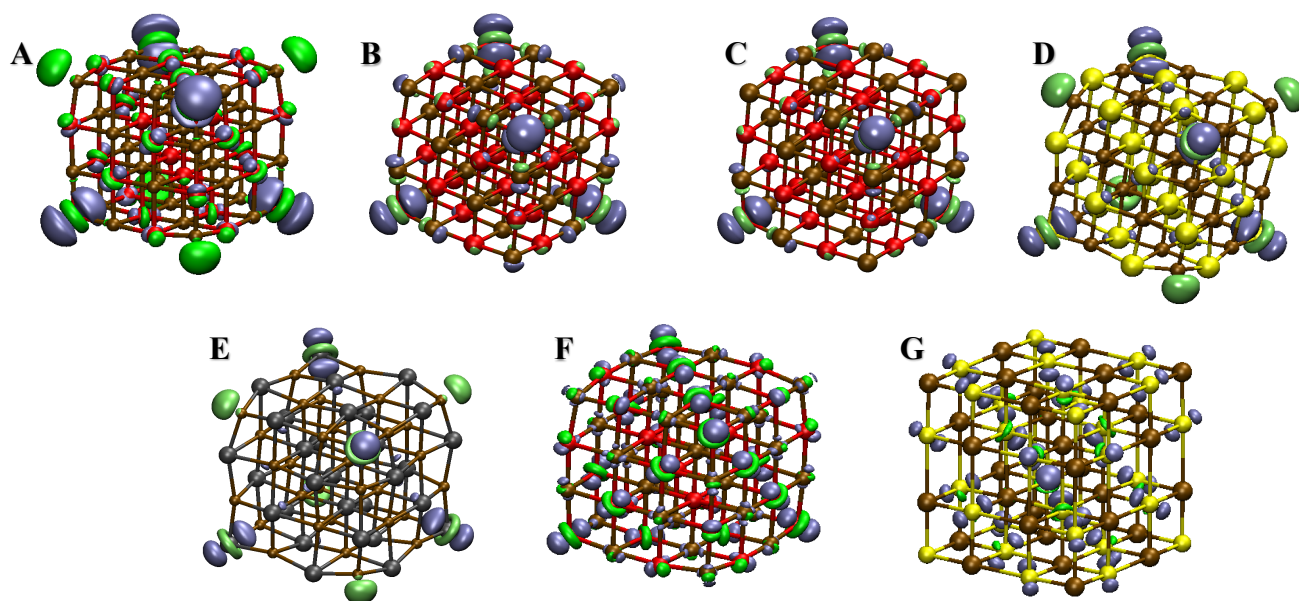

**Fig. S3** TD-B3LYP Electron density differences between the ground and lowest  $t_2$  excited state for A MgO, B CaO, C SrO, D MgS, E MgSe, F CdO and G PbS. Red spheres are oxygen atoms, brown are magnesium (or calcium/strontium/cadmium/lead) atoms, yellow spheres are sulphur atoms, black spheres are selenium atoms. Green shows gain in electron density (excited electron), blue shows loss in electron density (hole). Same contour value (0.001) used in all figures.

### ESI-4 Ground and Excited State Charges

**Table S3** Ground (*S0*) and Excited (*S1*) state NBO charges for (MgO)<sub>32</sub> calculated using TD-BHLYP and TD-B3LYP

| atom  | BHLYP    |          | B3LYP    |          |
|-------|----------|----------|----------|----------|
|       | GS       | ES       | GS       | ES       |
| 1 mg  | 1.82616  | 1.78011  | 1.80437  | 1.80004  |
| 2 o   | -1.81042 | -1.81107 | -1.78555 | -1.7884  |
| 3 o   | -1.82342 | -1.82132 | -1.80755 | -1.80514 |
| 4 mg  | 1.80892  | 1.8055   | 1.7918   | 1.78647  |
| 5 mg  | 1.80892  | 1.8055   | 1.7918   | 1.78647  |
| 6 o   | -1.82342 | -1.82132 | -1.80755 | -1.80514 |
| 7 o   | -1.81042 | -1.81107 | -1.78555 | -1.7884  |
| 8 mg  | 1.82616  | 1.78011  | 1.80437  | 1.80004  |
| 9 mg  | 1.8259   | 1.79208  | 1.79379  | 1.66047  |
| 10 o  | -1.81042 | -1.81107 | -1.78555 | -1.7884  |
| 11 mg | 1.82616  | 1.78011  | 1.80437  | 1.80004  |
| 12 o  | -1.79773 | -1.61586 | -1.76657 | -1.59975 |
| 13 mg | 1.8259   | 1.79208  | 1.79379  | 1.66047  |
| 14 o  | -1.81042 | -1.81107 | -1.78555 | -1.7884  |
| 15 mg | 1.82616  | 1.78011  | 1.80437  | 1.80004  |
| 16 o  | -1.79773 | -1.61586 | -1.76657 | -1.59975 |
| 17 mg | 1.82616  | 1.78011  | 1.80437  | 1.80004  |
| 18 o  | -1.81042 | -1.81107 | -1.78555 | -1.7884  |
| 19 o  | -1.82342 | -1.82132 | -1.80755 | -1.80514 |
| 20 mg | 1.80892  | 1.8055   | 1.7918   | 1.78647  |
| 21 mg | 1.80892  | 1.8055   | 1.7918   | 1.78647  |
| 22 o  | -1.82342 | -1.82132 | -1.80755 | -1.80514 |
| 23 o  | -1.81042 | -1.81107 | -1.78555 | -1.7884  |
| 24 mg | 1.82616  | 1.78011  | 1.80437  | 1.80004  |
| 25 mg | 1.8259   | 1.79208  | 1.79379  | 1.66047  |
| 26 o  | -1.81042 | -1.81107 | -1.78555 | -1.7884  |
| 27 mg | 1.82616  | 1.78011  | 1.80437  | 1.80004  |
| 28 o  | -1.79773 | -1.61586 | -1.76657 | -1.59975 |
| 29 mg | 1.8259   | 1.79208  | 1.79379  | 1.66047  |

|       |          |          |          |          |
|-------|----------|----------|----------|----------|
| 30 o  | -1.81042 | -1.81107 | -1.78555 | -1.7884  |
| 31 mg | 1.82616  | 1.78011  | 1.80437  | 1.80004  |
| 32 o  | -1.79773 | -1.61586 | -1.76657 | -1.59975 |
| 33 o  | -1.81042 | -1.81107 | -1.78555 | -1.7884  |
| 34 mg | 1.80892  | 1.8055   | 1.7918   | 1.78647  |
| 35 o  | -1.82342 | -1.82132 | -1.80755 | -1.80514 |
| 36 mg | 1.82616  | 1.78011  | 1.80437  | 1.80004  |
| 37 mg | 1.82616  | 1.78011  | 1.80437  | 1.80004  |
| 38 o  | -1.82342 | -1.82132 | -1.80755 | -1.80514 |
| 39 mg | 1.80892  | 1.8055   | 1.7918   | 1.78647  |
| 40 o  | -1.81042 | -1.81107 | -1.78555 | -1.7884  |
| 41 o  | -1.81042 | -1.81107 | -1.78555 | -1.7884  |
| 42 mg | 1.80892  | 1.8055   | 1.7918   | 1.78647  |
| 43 o  | -1.82342 | -1.82132 | -1.80755 | -1.80514 |
| 44 mg | 1.82616  | 1.78011  | 1.80437  | 1.80004  |
| 45 mg | 1.82616  | 1.78011  | 1.80437  | 1.80004  |
| 46 o  | -1.82342 | -1.82132 | -1.80755 | -1.80514 |
| 47 mg | 1.80892  | 1.8055   | 1.7918   | 1.78647  |
| 48 o  | -1.81042 | -1.81107 | -1.78555 | -1.7884  |
| 49 mg | 1.80892  | 1.8055   | 1.7918   | 1.78647  |
| 50 o  | -1.82342 | -1.82132 | -1.80755 | -1.80514 |
| 51 o  | -1.82342 | -1.82132 | -1.80755 | -1.80514 |
| 52 mg | 1.80892  | 1.8055   | 1.7918   | 1.78647  |
| 53 o  | -1.82934 | -1.84238 | -1.82048 | -1.83765 |
| 54 mg | 1.79747  | 1.80649  | 1.78406  | 1.79799  |
| 55 mg | 1.79747  | 1.80649  | 1.78406  | 1.79799  |
| 56 o  | -1.82934 | -1.84238 | -1.82048 | -1.83765 |
| 57 mg | 1.79747  | 1.80649  | 1.78406  | 1.79799  |
| 58 o  | -1.82934 | -1.84238 | -1.82048 | -1.83765 |
| 59 o  | -1.82934 | -1.84238 | -1.82048 | -1.83765 |
| 60 mg | 1.79747  | 1.80649  | 1.78406  | 1.79799  |
| 61 o  | -1.82342 | -1.82132 | -1.80755 | -1.80514 |
| 62 mg | 1.80892  | 1.8055   | 1.7918   | 1.78647  |
| 63 mg | 1.80892  | 1.8055   | 1.7918   | 1.78647  |
| 64 o  | -1.82342 | -1.82132 | -1.80755 | -1.80514 |

**Table S4** Ground (*S0*) and Excited (*S1*) state NBO charges for (CaO)<sub>32</sub> calculated using TD-BHLYP and TD-B3LYP.

| atom  | BHLYP    |          | B3LYP    |          |
|-------|----------|----------|----------|----------|
|       | GS       | ES       | GS       | ES       |
| 1 ca  | 1.81864  | 1.76752  | 1.77807  | 1.77822  |
| 2 o   | -1.80807 | -1.80476 | -1.76822 | -1.7671  |
| 3 o   | -1.80148 | -1.80916 | -1.76466 | -1.77815 |
| 4 ca  | 1.79695  | 1.79662  | 1.76225  | 1.76206  |
| 5 ca  | 1.79695  | 1.79662  | 1.76225  | 1.76206  |
| 6 o   | -1.80148 | -1.80916 | -1.76466 | -1.77815 |
| 7 o   | -1.80807 | -1.80476 | -1.76822 | -1.7671  |
| 8 ca  | 1.81864  | 1.76752  | 1.77807  | 1.77822  |
| 9 ca  | 1.79989  | 1.78526  | 1.74713  | 1.62779  |
| 10 o  | -1.80807 | -1.80476 | -1.76822 | -1.7671  |
| 11 ca | 1.81864  | 1.76752  | 1.77807  | 1.77822  |
| 12 o  | -1.80529 | -1.6236  | -1.76084 | -1.59922 |
| 13 ca | 1.79989  | 1.78526  | 1.74713  | 1.62779  |
| 14 o  | -1.80807 | -1.80476 | -1.76822 | -1.7671  |
| 15 ca | 1.81864  | 1.76752  | 1.77807  | 1.77822  |
| 16 o  | -1.80529 | -1.6236  | -1.76084 | -1.59922 |
| 17 ca | 1.81864  | 1.76752  | 1.77807  | 1.77822  |
| 18 o  | -1.80807 | -1.80476 | -1.76822 | -1.7671  |
| 19 o  | -1.80148 | -1.80916 | -1.76466 | -1.77815 |
| 20 ca | 1.79695  | 1.79662  | 1.76225  | 1.76206  |
| 21 ca | 1.79695  | 1.79662  | 1.76225  | 1.76206  |
| 22 o  | -1.80148 | -1.80916 | -1.76466 | -1.77815 |
| 23 o  | -1.80807 | -1.80476 | -1.76822 | -1.7671  |
| 24 ca | 1.81864  | 1.76752  | 1.77807  | 1.77822  |
| 25 ca | 1.79989  | 1.78526  | 1.74713  | 1.62779  |
| 26 o  | -1.80807 | -1.80476 | -1.76822 | -1.7671  |
| 27 ca | 1.81864  | 1.76752  | 1.77807  | 1.77822  |
| 28 o  | -1.80529 | -1.6236  | -1.76084 | -1.59922 |
| 29 ca | 1.79989  | 1.78526  | 1.74713  | 1.62779  |
| 30 o  | -1.80807 | -1.80476 | -1.76822 | -1.7671  |
| 31 ca | 1.81864  | 1.76752  | 1.77807  | 1.77822  |

|       |          |          |          |          |
|-------|----------|----------|----------|----------|
| 32 o  | -1.80529 | -1.6236  | -1.76084 | -1.59922 |
| 33 o  | -1.80807 | -1.80476 | -1.76822 | -1.7671  |
| 34 ca | 1.79695  | 1.79662  | 1.76225  | 1.76206  |
| 35 o  | -1.80148 | -1.80916 | -1.76466 | -1.77815 |
| 36 ca | 1.81864  | 1.76752  | 1.77807  | 1.77822  |
| 37 ca | 1.81864  | 1.76752  | 1.77807  | 1.77822  |
| 38 o  | -1.80148 | -1.80916 | -1.76466 | -1.77815 |
| 39 ca | 1.79695  | 1.79662  | 1.76225  | 1.76206  |
| 40 o  | -1.80807 | -1.80476 | -1.76822 | -1.7671  |
| 41 o  | -1.80807 | -1.80476 | -1.76822 | -1.7671  |
| 42 ca | 1.79695  | 1.79662  | 1.76225  | 1.76206  |
| 43 o  | -1.80148 | -1.80916 | -1.76466 | -1.77815 |
| 44 ca | 1.81864  | 1.76752  | 1.77807  | 1.77822  |
| 45 ca | 1.81864  | 1.76752  | 1.77807  | 1.77822  |
| 46 o  | -1.80148 | -1.80916 | -1.76466 | -1.77815 |
| 47 ca | 1.79695  | 1.79662  | 1.76225  | 1.76206  |
| 48 o  | -1.80807 | -1.80476 | -1.76822 | -1.7671  |
| 49 ca | 1.79695  | 1.79662  | 1.76225  | 1.76206  |
| 50 o  | -1.80148 | -1.80916 | -1.76466 | -1.77815 |
| 51 o  | -1.80148 | -1.80916 | -1.76466 | -1.77815 |
| 52 ca | 1.79695  | 1.79662  | 1.76225  | 1.76206  |
| 53 o  | -1.78023 | -1.79961 | -1.74363 | -1.78362 |
| 54 ca | 1.76749  | 1.78728  | 1.73503  | 1.76995  |
| 55 ca | 1.7675   | 1.78727  | 1.73503  | 1.76995  |
| 56 o  | -1.78023 | -1.79961 | -1.74363 | -1.78362 |
| 57 ca | 1.7675   | 1.78727  | 1.73503  | 1.76995  |
| 58 o  | -1.78023 | -1.79961 | -1.74363 | -1.78362 |
| 59 o  | -1.78023 | -1.79961 | -1.74363 | -1.78362 |
| 60 ca | 1.7675   | 1.78727  | 1.73503  | 1.76995  |
| 61 o  | -1.80148 | -1.80916 | -1.76466 | -1.77815 |
| 62 ca | 1.79695  | 1.79662  | 1.76225  | 1.76206  |
| 63 ca | 1.79695  | 1.79662  | 1.76225  | 1.76206  |
| 64 o  | -1.80148 | -1.80916 | -1.76466 | -1.77815 |

**Table S5** Ground (*S0*) and Excited (*S1*) state NBO charges for (SrO)<sub>32</sub> calculated using TD-BHLYP and TD-B3LYP.

| atom  | BHLYP    |          | B3LYP    |          |
|-------|----------|----------|----------|----------|
|       | GS       | ES       | GS       | ES       |
| 1 sr  | 1.83968  | 1.79128  | -1.79038 | 1.80193  |
| 2 o   | -1.8274  | -1.82448 | -1.79038 | -1.78954 |
| 3 o   | -1.82918 | -1.84118 | -1.79038 | -1.80741 |
| 4 sr  | 1.82466  | 1.82866  | -1.79038 | 1.79412  |
| 5 sr  | 1.82466  | 1.82866  | -1.79038 | 1.79412  |
| 6 o   | -1.82918 | -1.84118 | -1.79038 | -1.80741 |
| 7 o   | -1.8274  | -1.82448 | -1.79038 | -1.78954 |
| 8 sr  | 1.83968  | 1.79128  | -1.79038 | 1.80193  |
| 9 sr  | 1.8129   | 1.80534  | -1.79038 | 1.6763   |
| 10 o  | -1.8274  | -1.82448 | -1.79038 | -1.78954 |
| 11 sr | 1.83968  | 1.79128  | -1.79038 | 1.80193  |
| 12 o  | -1.82782 | -1.64841 | -1.79038 | -1.63026 |
| 13 sr | 1.8129   | 1.80534  | -1.79038 | 1.6763   |
| 14 o  | -1.8274  | -1.82448 | -1.79038 | -1.78954 |
| 15 sr | 1.83968  | 1.79128  | -1.79038 | 1.80193  |
| 16 o  | -1.82782 | -1.64841 | -1.79038 | -1.63026 |
| 17 sr | 1.83968  | 1.79128  | -1.79038 | 1.80193  |
| 18 o  | -1.8274  | -1.82448 | -1.79038 | -1.78954 |
| 19 o  | -1.82918 | -1.84118 | -1.79038 | -1.80741 |
| 20 sr | 1.82466  | 1.82866  | -1.79038 | 1.79412  |
| 21 sr | 1.82466  | 1.82866  | -1.79038 | 1.79412  |
| 22 o  | -1.82918 | -1.84118 | -1.79038 | -1.80741 |
| 23 o  | -1.8274  | -1.82448 | -1.79038 | -1.78954 |
| 24 sr | 1.83968  | 1.79128  | -1.79038 | 1.80193  |
| 25 sr | 1.8129   | 1.80534  | -1.79038 | 1.6763   |
| 26 o  | -1.8274  | -1.82448 | -1.79038 | -1.78954 |
| 27 sr | 1.83968  | 1.79128  | -1.79038 | 1.80193  |
| 28 o  | -1.82782 | -1.64841 | -1.79038 | -1.63026 |
| 29 sr | 1.8129   | 1.80534  | -1.79038 | 1.6763   |
| 30 o  | -1.8274  | -1.82448 | -1.79038 | -1.78954 |
| 31 sr | 1.83968  | 1.79128  | -1.79038 | 1.80193  |



|       |          |          |          |          |
|-------|----------|----------|----------|----------|
| 32 o  | -1.82782 | -1.64841 | -1.79038 | -1.63026 |
| 33 o  | -1.8274  | -1.82448 | -1.79038 | -1.78954 |
| 34 sr | 1.82466  | 1.82866  | -1.79038 | 1.79412  |
| 35 o  | -1.82918 | -1.84118 | -1.79038 | -1.80741 |
| 36 sr | 1.83968  | 1.79128  | -1.79038 | 1.80193  |
| 37 sr | 1.83968  | 1.79128  | -1.79038 | 1.80193  |
| 38 o  | -1.82918 | -1.84118 | -1.79038 | -1.80741 |
| 39 sr | 1.82466  | 1.82866  | -1.79038 | 1.79412  |
| 40 o  | -1.8274  | -1.82448 | -1.79038 | -1.78954 |
| 41 o  | -1.8274  | -1.82448 | -1.79038 | -1.78954 |
| 42 sr | 1.82466  | 1.82866  | -1.79038 | 1.79412  |
| 43 o  | -1.82918 | -1.84118 | -1.79038 | -1.80741 |
| 44 sr | 1.83968  | 1.79128  | -1.79038 | 1.80193  |
| 45 sr | 1.83968  | 1.79128  | -1.79038 | 1.80193  |
| 46 o  | -1.82918 | -1.84118 | -1.79038 | -1.80741 |
| 47 sr | 1.82466  | 1.82866  | -1.79038 | 1.79412  |
| 48 o  | -1.8274  | -1.82448 | -1.79038 | -1.78954 |
| 49 sr | 1.82466  | 1.82866  | -1.79038 | 1.79412  |
| 50 o  | -1.82918 | -1.84118 | -1.79038 | -1.80741 |
| 51 o  | -1.82918 | -1.84118 | -1.79038 | -1.80741 |
| 52 sr | 1.82466  | 1.82866  | -1.79038 | 1.79412  |
| 53 o  | -1.8143  | -1.84116 | -1.79038 | -1.8268  |
| 54 sr | 1.80594  | 1.82139  | -1.79038 | 1.78347  |
| 55 sr | 1.80593  | 1.82139  | -1.79038 | 1.78346  |
| 56 o  | -1.8143  | -1.84116 | -1.79038 | -1.8268  |
| 57 sr | 1.80593  | 1.82139  | -1.79038 | 1.78346  |
| 58 o  | -1.8143  | -1.84116 | -1.79038 | -1.8268  |
| 59 o  | -1.8143  | -1.84116 | -1.79038 | -1.8268  |
| 60 sr | 1.80593  | 1.82139  | -1.79038 | 1.78346  |
| 61 o  | -1.82918 | -1.84118 | -1.79038 | -1.80741 |
| 62 sr | 1.82466  | 1.82866  | -1.79038 | 1.79412  |
| 63 sr | 1.82466  | 1.82866  | -1.79038 | 1.79412  |
| 64 o  | -1.82918 | -1.84118 | -1.79038 | -1.80741 |

**Table S6** Ground (*S0*) and Excited (*S1*) state NBO charges for (MgS)<sub>32</sub> calculated using TD-BHLYP and TD-B3LYP.

| atom  | BHLYP    |          | B3LYP    |          |
|-------|----------|----------|----------|----------|
|       | GS       | ES       | GS       | ES       |
| 1 mg  | 1.69637  | 1.65427  | 1.66872  | 1.65361  |
| 2 s   | -1.66803 | -1.66676 | -1.63726 | -1.63795 |
| 3 s   | -1.72286 | -1.70644 | -1.70158 | -1.68071 |
| 4 mg  | 1.69445  | 1.69217  | 1.66969  | 1.66388  |
| 5 mg  | 1.69445  | 1.69217  | 1.66969  | 1.66388  |
| 6 s   | -1.72286 | -1.70644 | -1.70158 | -1.68071 |
| 7 s   | -1.66803 | -1.66676 | -1.63726 | -1.63795 |
| 8 mg  | 1.69637  | 1.65427  | 1.66872  | 1.65361  |
| 9 mg  | 1.69806  | 1.64787  | 1.66668  | 1.54781  |
| 10 s  | -1.66803 | -1.66676 | -1.63726 | -1.63795 |
| 11 mg | 1.69637  | 1.65427  | 1.66872  | 1.65361  |
| 12 s  | -1.603   | -1.46496 | -1.56077 | -1.44228 |
| 13 mg | 1.69806  | 1.64787  | 1.66668  | 1.54781  |
| 14 s  | -1.66803 | -1.66676 | -1.63726 | -1.63795 |
| 15 mg | 1.69637  | 1.65427  | 1.66872  | 1.65361  |
| 16 s  | -1.603   | -1.46496 | -1.56077 | -1.44228 |
| 17 mg | 1.69637  | 1.65427  | 1.66872  | 1.65361  |
| 18 s  | -1.66803 | -1.66676 | -1.63726 | -1.63795 |
| 19 s  | -1.72286 | -1.70644 | -1.70158 | -1.68071 |
| 20 mg | 1.69445  | 1.69217  | 1.66969  | 1.66388  |
| 21 mg | 1.69445  | 1.69217  | 1.66969  | 1.66388  |
| 22 s  | -1.72286 | -1.70644 | -1.70158 | -1.68071 |
| 23 s  | -1.66803 | -1.66676 | -1.63726 | -1.63795 |
| 24 mg | 1.69637  | 1.65427  | 1.66872  | 1.65361  |
| 25 mg | 1.69806  | 1.64787  | 1.66668  | 1.54781  |
| 26 s  | -1.66803 | -1.66676 | -1.63726 | -1.63795 |
| 27 mg | 1.69637  | 1.65427  | 1.66872  | 1.65361  |
| 28 s  | -1.603   | -1.46496 | -1.56077 | -1.44228 |
| 29 mg | 1.69806  | 1.64787  | 1.66668  | 1.54781  |
| 30 s  | -1.66803 | -1.66676 | -1.63726 | -1.63795 |
| 31 mg | 1.69637  | 1.65427  | 1.66872  | 1.65361  |

|       |          |          |          |          |
|-------|----------|----------|----------|----------|
| 32 s  | -1.603   | -1.46496 | -1.56077 | -1.44228 |
| 33 s  | -1.66803 | -1.66676 | -1.63726 | -1.63795 |
| 34 mg | 1.69445  | 1.69217  | 1.66969  | 1.66388  |
| 35 s  | -1.72286 | -1.70644 | -1.70158 | -1.68071 |
| 36 mg | 1.69637  | 1.65427  | 1.66872  | 1.65361  |
| 37 mg | 1.69637  | 1.65427  | 1.66872  | 1.65361  |
| 38 s  | -1.72286 | -1.70644 | -1.70158 | -1.68071 |
| 39 mg | 1.69445  | 1.69217  | 1.66969  | 1.66388  |
| 40 s  | -1.66803 | -1.66676 | -1.63726 | -1.63795 |
| 41 s  | -1.66803 | -1.66676 | -1.63726 | -1.63795 |
| 42 mg | 1.69445  | 1.69217  | 1.66969  | 1.66388  |
| 43 s  | -1.72286 | -1.70644 | -1.70158 | -1.68071 |
| 44 mg | 1.69637  | 1.65427  | 1.66872  | 1.65361  |
| 45 mg | 1.69637  | 1.65427  | 1.66872  | 1.65361  |
| 46 s  | -1.72286 | -1.70644 | -1.70158 | -1.68071 |
| 47 mg | 1.69445  | 1.69217  | 1.66969  | 1.66388  |
| 48 s  | -1.66803 | -1.66676 | -1.63726 | -1.63795 |
| 49 mg | 1.69445  | 1.69217  | 1.66969  | 1.66388  |
| 50 s  | -1.72286 | -1.70644 | -1.70158 | -1.68071 |
| 51 s  | -1.72286 | -1.70644 | -1.70158 | -1.68071 |
| 52 mg | 1.69445  | 1.69217  | 1.66969  | 1.66388  |
| 53 s  | -1.76864 | -1.76828 | -1.75919 | -1.75798 |
| 54 mg | 1.67377  | 1.66565  | 1.65459  | 1.65596  |
| 55 mg | 1.67377  | 1.66565  | 1.65459  | 1.65596  |
| 56 s  | -1.76864 | -1.76828 | -1.75919 | -1.75798 |
| 57 mg | 1.67377  | 1.66565  | 1.65459  | 1.65596  |
| 58 s  | -1.76864 | -1.76828 | -1.75919 | -1.75798 |
| 59 s  | -1.76864 | -1.76828 | -1.75919 | -1.75798 |
| 60 mg | 1.67377  | 1.66565  | 1.65459  | 1.65596  |
| 61 s  | -1.72286 | -1.70644 | -1.70158 | -1.68071 |
| 62 mg | 1.69445  | 1.69217  | 1.66969  | 1.66388  |
| 63 mg | 1.69445  | 1.69217  | 1.66969  | 1.66388  |
| 64 s  | -1.72286 | -1.70644 | -1.70158 | -1.68071 |

**Table S7** Ground (*S0*) and Excited (*S1*) state NBO charges for (MgSe)<sub>32</sub> calculated using TD-BHLYP and TD-B3LYP.

| atom  | BHLYP    |          | B3LYP    |          |
|-------|----------|----------|----------|----------|
|       | GS       | ES       | GS       | ES       |
| 1 mg  | 1.65627  | 1.62031  | 1.62327  | 1.60363  |
| 2 se  | -1.62765 | -1.6238  | -1.5914  | -1.59015 |
| 3 se  | -1.68852 | -1.66568 | -1.66239 | -1.63697 |
| 4 mg  | 1.65658  | 1.65357  | 1.62657  | 1.62097  |
| 5 mg  | 1.65658  | 1.65357  | 1.62657  | 1.62097  |
| 6 se  | -1.68852 | -1.66568 | -1.66239 | -1.63697 |
| 7 se  | -1.62765 | -1.6238  | -1.5914  | -1.59015 |
| 8 mg  | 1.65627  | 1.62031  | 1.62327  | 1.60363  |
| 9 mg  | 1.66225  | 1.59242  | 1.62685  | 1.52086  |
| 10 se | -1.62765 | -1.6238  | -1.5914  | -1.59015 |
| 11 mg | 1.65627  | 1.62031  | 1.62327  | 1.60363  |
| 12 se | -1.54446 | -1.43592 | -1.49473 | -1.40001 |
| 13 mg | 1.66225  | 1.59242  | 1.62685  | 1.52086  |
| 14 se | -1.62765 | -1.6238  | -1.5914  | -1.59015 |
| 15 mg | 1.65627  | 1.62031  | 1.62327  | 1.60363  |
| 16 se | -1.54446 | -1.43592 | -1.49473 | -1.40001 |
| 17 mg | 1.65627  | 1.62031  | 1.62327  | 1.60363  |
| 18 se | -1.62765 | -1.6238  | -1.5914  | -1.59015 |
| 19 se | -1.68852 | -1.66568 | -1.66239 | -1.63697 |
| 20 mg | 1.65658  | 1.65357  | 1.62657  | 1.62097  |
| 21 mg | 1.65658  | 1.65357  | 1.62657  | 1.62097  |
| 22 se | -1.68852 | -1.66568 | -1.66239 | -1.63697 |
| 23 se | -1.62765 | -1.6238  | -1.5914  | -1.59015 |
| 24 mg | 1.65627  | 1.62031  | 1.62327  | 1.60363  |
| 25 mg | 1.66225  | 1.59242  | 1.62685  | 1.52086  |
| 26 se | -1.62765 | -1.6238  | -1.5914  | -1.59015 |
| 27 mg | 1.65627  | 1.62031  | 1.62327  | 1.60363  |
| 28 se | -1.54446 | -1.43592 | -1.49473 | -1.40001 |
| 29 mg | 1.66225  | 1.59242  | 1.62685  | 1.52086  |
| 30 se | -1.62765 | -1.6238  | -1.5914  | -1.59015 |
| 31 mg | 1.65627  | 1.62031  | 1.62327  | 1.60363  |

|       |          |          |          |          |
|-------|----------|----------|----------|----------|
| 32 se | -1.54446 | -1.43592 | -1.49473 | -1.40001 |
| 33 se | -1.62765 | -1.6238  | -1.5914  | -1.59015 |
| 34 mg | 1.65658  | 1.65357  | 1.62657  | 1.62097  |
| 35 se | -1.68852 | -1.66568 | -1.66239 | -1.63697 |
| 36 mg | 1.65627  | 1.62031  | 1.62327  | 1.60363  |
| 37 mg | 1.65627  | 1.62031  | 1.62327  | 1.60363  |
| 38 se | -1.68852 | -1.66568 | -1.66239 | -1.63697 |
| 39 mg | 1.65658  | 1.65357  | 1.62657  | 1.62097  |
| 40 se | -1.62765 | -1.6238  | -1.5914  | -1.59015 |
| 41 se | -1.62765 | -1.6238  | -1.5914  | -1.59015 |
| 42 mg | 1.65658  | 1.65357  | 1.62657  | 1.62097  |
| 43 se | -1.68852 | -1.66568 | -1.66239 | -1.63697 |
| 44 mg | 1.65627  | 1.62031  | 1.62327  | 1.60363  |
| 45 mg | 1.65627  | 1.62031  | 1.62327  | 1.60363  |
| 46 se | -1.68852 | -1.66568 | -1.66239 | -1.63697 |
| 47 mg | 1.65658  | 1.65357  | 1.62657  | 1.62097  |
| 48 se | -1.62765 | -1.6238  | -1.5914  | -1.59015 |
| 49 mg | 1.65658  | 1.65357  | 1.62657  | 1.62097  |
| 50 se | -1.68852 | -1.66568 | -1.66239 | -1.63697 |
| 51 se | -1.68852 | -1.66568 | -1.66239 | -1.63697 |
| 52 mg | 1.65658  | 1.65357  | 1.62657  | 1.62097  |
| 53 se | -1.74564 | -1.74217 | -1.73577 | -1.72929 |
| 54 mg | 1.63781  | 1.63248  | 1.61552  | 1.616    |
| 55 mg | 1.63781  | 1.63248  | 1.61552  | 1.616    |
| 56 se | -1.74564 | -1.74217 | -1.73577 | -1.72929 |
| 57 mg | 1.63781  | 1.63248  | 1.61552  | 1.616    |
| 58 se | -1.74564 | -1.74217 | -1.73577 | -1.72929 |
| 59 se | -1.74564 | -1.74217 | -1.73577 | -1.72929 |
| 60 mg | 1.63781  | 1.63248  | 1.61552  | 1.616    |
| 61 se | -1.68852 | -1.66568 | -1.66239 | -1.63697 |
| 62 mg | 1.65658  | 1.65357  | 1.62657  | 1.62097  |
| 63 mg | 1.65658  | 1.65357  | 1.62657  | 1.62097  |
| 64 se | -1.68852 | -1.66568 | -1.66239 | -1.63697 |

**Table S8** Ground (*S0*) and Excited (*S1*) state NBO charges for (CdO)<sub>32</sub> calculated using TD-BHLYP and TD-B3LYP.

| atom  | BHLYP    |          | B3LYP    |          |
|-------|----------|----------|----------|----------|
|       | GS       | ES       | GS       | ES       |
| 1 cd  | 1.72014  | 1.70521  | 1.63845  | 1.62764  |
| 2 o   | -1.68809 | -1.6698  | -1.59764 | -1.58806 |
| 3 o   | -1.76685 | -1.74595 | -1.69359 | -1.67269 |
| 4 cd  | 1.73112  | 1.72142  | 1.65061  | 1.64348  |
| 5 cd  | 1.73112  | 1.72142  | 1.65061  | 1.64348  |
| 6 o   | -1.76685 | -1.74595 | -1.69359 | -1.67269 |
| 7 o   | -1.68809 | -1.6698  | -1.59764 | -1.58806 |
| 8 cd  | 1.72014  | 1.70521  | 1.63845  | 1.62764  |
| 9 cd  | 1.70037  | 1.62589  | 1.5998   | 1.53624  |
| 10 o  | -1.68809 | -1.6698  | -1.59764 | -1.58806 |
| 11 cd | 1.72014  | 1.70521  | 1.63845  | 1.62764  |
| 12 o  | -1.58991 | -1.55426 | -1.47304 | -1.44262 |
| 13 cd | 1.70037  | 1.62589  | 1.5998   | 1.53624  |
| 14 o  | -1.68809 | -1.6698  | -1.59764 | -1.58806 |
| 15 cd | 1.72014  | 1.70521  | 1.63845  | 1.62764  |
| 16 o  | -1.58991 | -1.55426 | -1.47304 | -1.44262 |
| 17 cd | 1.72014  | 1.70521  | 1.63845  | 1.62764  |
| 18 o  | -1.68809 | -1.6698  | -1.59764 | -1.58806 |
| 19 o  | -1.76685 | -1.74595 | -1.69359 | -1.67269 |
| 20 cd | 1.73112  | 1.72142  | 1.65061  | 1.64348  |
| 21 cd | 1.73112  | 1.72142  | 1.65061  | 1.64348  |
| 22 o  | -1.76685 | -1.74595 | -1.69359 | -1.67269 |
| 23 o  | -1.68809 | -1.6698  | -1.59764 | -1.58806 |
| 24 cd | 1.72014  | 1.70521  | 1.63845  | 1.62764  |
| 25 cd | 1.70037  | 1.62589  | 1.5998   | 1.53624  |
| 26 o  | -1.68809 | -1.6698  | -1.59764 | -1.58806 |
| 27 cd | 1.72014  | 1.70521  | 1.63845  | 1.62764  |
| 28 o  | -1.58991 | -1.55426 | -1.47304 | -1.44262 |
| 29 cd | 1.70037  | 1.62589  | 1.5998   | 1.53624  |
| 30 o  | -1.68809 | -1.6698  | -1.59764 | -1.58806 |
| 31 cd | 1.72014  | 1.70521  | 1.63845  | 1.62764  |

|       |          |          |          |          |
|-------|----------|----------|----------|----------|
| 32 o  | -1.58991 | -1.55426 | -1.47304 | -1.44262 |
| 33 o  | -1.68809 | -1.6698  | -1.59764 | -1.58806 |
| 34 cd | 1.73112  | 1.72142  | 1.65061  | 1.64348  |
| 35 o  | -1.76685 | -1.74595 | -1.69359 | -1.67269 |
| 36 cd | 1.72014  | 1.70521  | 1.63845  | 1.62764  |
| 37 cd | 1.72014  | 1.70521  | 1.63845  | 1.62764  |
| 38 o  | -1.76685 | -1.74595 | -1.69359 | -1.67269 |
| 39 cd | 1.73112  | 1.72142  | 1.65061  | 1.64348  |
| 40 o  | -1.68809 | -1.6698  | -1.59764 | -1.58806 |
| 41 o  | -1.68809 | -1.6698  | -1.59764 | -1.58806 |
| 42 cd | 1.73112  | 1.72142  | 1.65061  | 1.64348  |
| 43 o  | -1.76685 | -1.74595 | -1.69359 | -1.67269 |
| 44 cd | 1.72014  | 1.70521  | 1.63845  | 1.62764  |
| 45 cd | 1.72014  | 1.70521  | 1.63845  | 1.62764  |
| 46 o  | -1.76685 | -1.74595 | -1.69359 | -1.67269 |
| 47 cd | 1.73112  | 1.72142  | 1.65061  | 1.64348  |
| 48 o  | -1.68809 | -1.6698  | -1.59764 | -1.58806 |
| 49 cd | 1.73112  | 1.72142  | 1.65061  | 1.64348  |
| 50 o  | -1.76685 | -1.74595 | -1.69359 | -1.67269 |
| 51 o  | -1.76685 | -1.74595 | -1.69359 | -1.67269 |
| 52 cd | 1.73112  | 1.72142  | 1.65061  | 1.64348  |
| 53 o  | -1.81527 | -1.81725 | -1.75764 | -1.75964 |
| 54 cd | 1.71584  | 1.71295  | 1.63742  | 1.63487  |
| 55 cd | 1.71584  | 1.71295  | 1.63742  | 1.63487  |
| 56 o  | -1.81527 | -1.81725 | -1.75764 | -1.75964 |
| 57 cd | 1.71584  | 1.71295  | 1.63742  | 1.63487  |
| 58 o  | -1.81527 | -1.81725 | -1.75764 | -1.75964 |
| 59 o  | -1.81527 | -1.81725 | -1.75764 | -1.75964 |
| 60 cd | 1.71584  | 1.71295  | 1.63742  | 1.63487  |
| 61 o  | -1.76685 | -1.74595 | -1.69359 | -1.67269 |
| 62 cd | 1.73112  | 1.72142  | 1.65061  | 1.64348  |
| 63 cd | 1.73112  | 1.72142  | 1.65061  | 1.64348  |
| 64 o  | -1.76685 | -1.74595 | -1.69359 | -1.67269 |

**Table S9** Ground (*S0*) and Excited (*S1*) state NBO charges for (PbS)<sub>32</sub> calculated using TD-BHLYP and TD-B3LYP.

| atom  | BHLYP    |          | B3LYP    |          |
|-------|----------|----------|----------|----------|
|       | GS       | ES       | GS       | ES       |
| 1 pb  | 1.16494  | 1.15192  | 1.12306  | 1.11333  |
| 2 s   | -1.22072 | -1.20021 | -1.16745 | -1.15054 |
| 3 s   | -1.2235  | -1.2048  | -1.17672 | -1.15631 |
| 4 pb  | 1.31834  | 1.29067  | 1.26651  | 1.23879  |
| 5 pb  | 1.31834  | 1.29067  | 1.26651  | 1.23879  |
| 6 s   | -1.2235  | -1.2048  | -1.17672 | -1.15631 |
| 7 s   | -1.22072 | -1.20021 | -1.16745 | -1.15054 |
| 8 pb  | 1.16494  | 1.15192  | 1.12306  | 1.11333  |
| 9 pb  | 1.0613   | 1.05692  | 1.01591  | 1.01978  |
| 10 s  | -1.22072 | -1.20021 | -1.16745 | -1.15054 |
| 11 pb | 1.16494  | 1.15192  | 1.12306  | 1.11333  |
| 12 s  | -1.08362 | -1.07027 | -1.03779 | -1.01715 |
| 13 pb | 1.0613   | 1.05692  | 1.01591  | 1.01978  |
| 14 s  | -1.22072 | -1.20021 | -1.16745 | -1.15054 |
| 15 pb | 1.16494  | 1.15192  | 1.12306  | 1.11333  |
| 16 s  | -1.08362 | -1.07027 | -1.03779 | -1.01715 |
| 17 pb | 1.16494  | 1.15192  | 1.12306  | 1.11333  |
| 18 s  | -1.22072 | -1.20021 | -1.16745 | -1.15054 |
| 19 s  | -1.2235  | -1.2048  | -1.17672 | -1.15631 |
| 20 pb | 1.31834  | 1.29067  | 1.26651  | 1.23879  |
| 21 pb | 1.31834  | 1.29067  | 1.26651  | 1.23879  |
| 22 s  | -1.2235  | -1.2048  | -1.17672 | -1.15631 |
| 23 s  | -1.22072 | -1.20021 | -1.16745 | -1.15054 |
| 24 pb | 1.16494  | 1.15192  | 1.12306  | 1.11333  |
| 25 pb | 1.0613   | 1.05692  | 1.01591  | 1.01978  |
| 26 s  | -1.22072 | -1.20021 | -1.16745 | -1.15054 |
| 27 pb | 1.16494  | 1.15192  | 1.12306  | 1.11333  |
| 28 s  | -1.08362 | -1.07027 | -1.03779 | -1.01715 |
| 29 pb | 1.0613   | 1.05692  | 1.01591  | 1.01978  |
| 30 s  | -1.22072 | -1.20021 | -1.16745 | -1.15054 |
| 31 pb | 1.16494  | 1.15192  | 1.12306  | 1.11333  |



|       |          |          |          |          |
|-------|----------|----------|----------|----------|
| 32 s  | -1.08362 | -1.07027 | -1.03779 | -1.01715 |
| 33 s  | -1.22072 | -1.20021 | -1.16745 | -1.15054 |
| 34 pb | 1.31834  | 1.29067  | 1.26651  | 1.23879  |
| 35 s  | -1.2235  | -1.2048  | -1.17672 | -1.15631 |
| 36 pb | 1.16494  | 1.15192  | 1.12306  | 1.11333  |
| 37 pb | 1.16494  | 1.15192  | 1.12306  | 1.11333  |
| 38 s  | -1.2235  | -1.2048  | -1.17672 | -1.15631 |
| 39 pb | 1.31834  | 1.29067  | 1.26651  | 1.23879  |
| 40 s  | -1.22072 | -1.20021 | -1.16745 | -1.15054 |
| 41 s  | -1.22072 | -1.20021 | -1.16745 | -1.15054 |
| 42 pb | 1.31834  | 1.29067  | 1.26651  | 1.23879  |
| 43 s  | -1.2235  | -1.2048  | -1.17672 | -1.15631 |
| 44 pb | 1.16494  | 1.15192  | 1.12306  | 1.11333  |
| 45 pb | 1.16494  | 1.15192  | 1.12306  | 1.11333  |
| 46 s  | -1.2235  | -1.2048  | -1.17672 | -1.15631 |
| 47 pb | 1.31834  | 1.29067  | 1.26651  | 1.23879  |
| 48 s  | -1.22072 | -1.20021 | -1.16745 | -1.15054 |
| 49 pb | 1.31834  | 1.29067  | 1.26651  | 1.23879  |
| 50 s  | -1.2235  | -1.2048  | -1.17672 | -1.15631 |
| 51 s  | -1.2235  | -1.2048  | -1.17672 | -1.15631 |
| 52 pb | 1.31834  | 1.29067  | 1.26651  | 1.23879  |
| 53 s  | -1.30299 | -1.28108 | -1.26146 | -1.25068 |
| 54 pb | 1.20814  | 1.18173  | 1.14714  | 1.11226  |
| 55 pb | 1.20814  | 1.18173  | 1.14714  | 1.11226  |
| 56 s  | -1.30299 | -1.28108 | -1.26146 | -1.25068 |
| 57 pb | 1.20814  | 1.18173  | 1.14714  | 1.11226  |
| 58 s  | -1.30299 | -1.28108 | -1.26146 | -1.25068 |
| 59 s  | -1.30299 | -1.28108 | -1.26146 | -1.25068 |
| 60 pb | 1.20814  | 1.18173  | 1.14714  | 1.11226  |
| 61 s  | -1.2235  | -1.2048  | -1.17672 | -1.15631 |
| 62 pb | 1.31834  | 1.29067  | 1.26651  | 1.23879  |
| 63 pb | 1.31834  | 1.29067  | 1.26651  | 1.23879  |
| 64 s  | -1.2235  | -1.2048  | -1.17672 | -1.15631 |

**Table S10** *BHLYP* optimised structure for  $(\text{MgO})_{32}$ .

|    |            |            |            |
|----|------------|------------|------------|
| Mg | -1.0277312 | 3.0116526  | 3.0116526  |
| O  | 0.9879546  | 3.0711083  | 3.0711083  |
| O  | -0.9966669 | 0.9966669  | 3.1235099  |
| Mg | 0.9975966  | 0.9975966  | 3.0921183  |
| Mg | -0.9975966 | -0.9975966 | 3.0921183  |
| O  | 0.9966669  | -0.9966669 | 3.1235099  |
| O  | -0.9879546 | -3.0711083 | 3.0711083  |
| Mg | 1.0277312  | -3.0116526 | 3.0116526  |
| Mg | 2.8864030  | 2.8864030  | 2.8864030  |
| O  | 3.0711083  | 0.9879546  | 3.0711083  |
| Mg | 3.0116526  | -1.0277312 | 3.0116526  |
| O  | 2.9779056  | -2.9779056 | 2.9779056  |
| Mg | -2.8864030 | -2.8864030 | 2.8864030  |
| O  | -3.0711083 | -0.9879546 | 3.0711083  |
| Mg | -3.0116526 | 1.0277312  | 3.0116526  |
| O  | -2.9779056 | 2.9779056  | 2.9779056  |
| Mg | -3.0116526 | 3.0116526  | 1.0277312  |
| O  | -3.0711083 | 3.0711083  | -0.9879546 |
| O  | -3.1235099 | 0.9966669  | 0.9966669  |
| Mg | -3.0921183 | 0.9975966  | -0.9975966 |
| Mg | -3.0921183 | -0.9975966 | 0.9975966  |
| O  | -3.1235099 | -0.9966669 | -0.9966669 |
| O  | -3.0711083 | -3.0711083 | 0.9879546  |
| Mg | -3.0116526 | -3.0116526 | -1.0277312 |
| Mg | -2.8864030 | 2.8864030  | -2.8864030 |
| O  | -3.0711083 | 0.9879546  | -3.0711083 |
| Mg | -3.0116526 | -1.0277312 | -3.0116526 |
| O  | -2.9779056 | -2.9779056 | -2.9779056 |
| Mg | 2.8864030  | -2.8864030 | -2.8864030 |
| O  | 3.0711083  | -0.9879546 | -3.0711083 |
| Mg | 3.0116526  | 1.0277312  | -3.0116526 |
| O  | 2.9779056  | 2.9779056  | -2.9779056 |
| O  | 0.9879546  | -3.0711083 | -3.0711083 |
| Mg | 0.9975966  | -0.9975966 | -3.0921183 |
| O  | 0.9966669  | 0.9966669  | -3.1235099 |
| Mg | 1.0277312  | 3.0116526  | -3.0116526 |
| Mg | -1.0277312 | -3.0116526 | -3.0116526 |
| O  | -0.9966669 | -0.9966669 | -3.1235099 |
| Mg | -0.9975966 | 0.9975966  | -3.0921183 |
| O  | -0.9879546 | 3.0711083  | -3.0711083 |
| O  | 3.0711083  | -3.0711083 | -0.9879546 |
| Mg | 3.0921183  | -0.9975966 | -0.9975966 |
| O  | 3.1235099  | 0.9966669  | -0.9966669 |
| Mg | 3.0116526  | 3.0116526  | -1.0277312 |
| Mg | 3.0116526  | -3.0116526 | 1.0277312  |
| O  | 3.1235099  | -0.9966669 | 0.9966669  |
| Mg | 3.0921183  | 0.9975966  | 0.9975966  |
| O  | 3.0711083  | 3.0711083  | 0.9879546  |
| Mg | 0.9975966  | -3.0921183 | -0.9975966 |
| O  | 0.9966669  | -3.1235099 | 0.9966669  |
| O  | -0.9966669 | -3.1235099 | -0.9966669 |
| Mg | -0.9975966 | -3.0921183 | 0.9975966  |
| O  | 1.0219252  | -1.0219252 | -1.0219252 |
| Mg | 1.0214066  | -1.0214066 | 1.0214066  |
| Mg | -1.0214066 | -1.0214066 | -1.0214066 |
| O  | -1.0219252 | -1.0219252 | 1.0219252  |
| Mg | 1.0214066  | 1.0214066  | -1.0214066 |

|    |            |           |            |
|----|------------|-----------|------------|
| O  | 1.0219252  | 1.0219252 | 1.0219252  |
| O  | -1.0219252 | 1.0219252 | -1.0219252 |
| Mg | -1.0214066 | 1.0214066 | 1.0214066  |
| O  | 0.9966669  | 3.1235099 | -0.9966669 |
| Mg | 0.9975966  | 3.0921183 | 0.9975966  |
| Mg | -0.9975966 | 3.0921183 | -0.9975966 |
| O  | -0.9966669 | 3.1235099 | 0.9966669  |

**Table S11** *BHLYP optimised structure for (CaO)<sub>32</sub>.*

|    |            |            |            |
|----|------------|------------|------------|
| Ca | -1.1730964 | 3.4970294  | 3.4970294  |
| O  | 1.1930546  | 3.4770303  | 3.4770303  |
| O  | -1.1756354 | 1.1756354  | 3.5445770  |
| Ca | 1.1560595  | 1.1560595  | 3.5746546  |
| Ca | -1.1560595 | -1.1560595 | 3.5746546  |
| O  | 1.1756354  | -1.1756354 | 3.5445770  |
| O  | -1.1930546 | -3.4770303 | 3.4770303  |
| Ca | 1.1730964  | -3.4970294 | 3.4970294  |
| Ca | 3.3893111  | 3.3893111  | 3.3893111  |
| O  | 3.4770303  | 1.1930546  | 3.4770303  |
| Ca | 3.4970294  | -1.1730964 | 3.4970294  |
| O  | 3.3670174  | -3.3670174 | 3.3670174  |
| Ca | -3.3893111 | -3.3893111 | 3.3893111  |
| O  | -3.4770303 | -1.1930546 | 3.4770303  |
| Ca | -3.4970294 | 1.1730964  | 3.4970294  |
| O  | -3.3670174 | 3.3670174  | 3.3670174  |
| Ca | -3.4970294 | 3.4970294  | 1.1730964  |
| O  | -3.4770303 | 3.4770303  | -1.1930546 |
| O  | -3.5445770 | 1.1756354  | 1.1756354  |
| Ca | -3.5746546 | 1.1560595  | -1.1560595 |
| Ca | -3.5746546 | -1.1560595 | 1.1560595  |
| O  | -3.5445770 | -1.1756354 | -1.1756354 |
| O  | -3.4770303 | -3.4770303 | 1.1930546  |
| Ca | -3.4970294 | -3.4970294 | -1.1730964 |
| Ca | -3.3893111 | 3.3893111  | -3.3893111 |
| O  | -3.4770303 | 1.1930546  | -3.4770303 |
| Ca | -3.4970294 | -1.1730964 | -3.4970294 |
| O  | -3.3670174 | -3.3670174 | -3.3670174 |
| Ca | 3.3893111  | -3.3893111 | -3.3893111 |
| O  | 3.4770303  | -1.1930546 | -3.4770303 |
| Ca | 3.4970294  | 1.1730964  | -3.4970294 |
| O  | 3.3670174  | 3.3670174  | -3.3670174 |
| O  | 1.1930546  | -3.4770303 | -3.4770303 |
| Ca | 1.1560595  | -1.1560595 | -3.5746546 |
| O  | 1.1756354  | 1.1756354  | -3.5445770 |
| Ca | 1.1730964  | 3.4970294  | -3.4970294 |
| Ca | -1.1730964 | -3.4970294 | -3.4970294 |
| O  | -1.1756354 | -1.1756354 | -3.5445770 |
| Ca | -1.1560595 | 1.1560595  | -3.5746546 |
| O  | -1.1930546 | 3.4770303  | -3.4770303 |
| O  | 3.4770303  | -3.4770303 | -1.1930546 |
| Ca | 3.5746546  | -1.1560595 | -1.1560595 |
| O  | 3.5445770  | 1.1756354  | -1.1756354 |
| Ca | 3.4970294  | 3.4970294  | -1.1730964 |
| Ca | 3.4970294  | -3.4970294 | 1.1730964  |
| O  | 3.5445770  | -1.1756354 | 1.1756354  |
| Ca | 3.5746546  | 1.1560595  | 1.1560595  |
| O  | 3.4770303  | 3.4770303  | 1.1930546  |

|    |            |            |            |
|----|------------|------------|------------|
| Ca | 1.1560595  | -3.5746546 | -1.1560595 |
| O  | 1.1756354  | -3.5445770 | 1.1756354  |
| O  | -1.1756354 | -3.5445770 | -1.1756354 |
| Ca | -1.1560595 | -3.5746546 | 1.1560595  |
| O  | 1.1879863  | -1.1879863 | -1.1879863 |
| Ca | 1.1734556  | -1.1734556 | 1.1734556  |
| Ca | -1.1734556 | -1.1734556 | -1.1734556 |
| O  | -1.1879863 | -1.1879863 | 1.1879863  |
| Ca | 1.1734556  | 1.1734556  | -1.1734556 |
| O  | 1.1879863  | 1.1879863  | 1.1879863  |
| O  | -1.1879863 | 1.1879863  | -1.1879863 |
| Ca | -1.1734556 | 1.1734556  | 1.1734556  |
| O  | 1.1756354  | 3.5445770  | -1.1756354 |
| Ca | 1.1560595  | 3.5746546  | 1.1560595  |
| Ca | -1.1560595 | 3.5746546  | -1.1560595 |
| O  | -1.1756354 | 3.5445770  | 1.1756354  |

**Table S12** *BHLYP* optimised structure for  $(\text{SrO})_{32}$ .

|    |                   |                   |                   |
|----|-------------------|-------------------|-------------------|
| Sr | -1.2563008        | 3.7658826         | 3.7658826         |
| O  | <u>1.3100490</u>  | 3.6949401         | 3.6949401         |
| O  | -1.2855187        | 1.2855187         | 3.7830932         |
| Sr | 1.2405094         | 1.2405094         | 3.8472054         |
| Sr | -1.2405094        | -1.2405094        | 3.8472054         |
| O  | 1.2855187         | -1.2855187        | 3.7830932         |
| O  | <u>-1.3100490</u> | -3.6949401        | 3.6949401         |
| Sr | 1.2563008         | -3.7658826        | 3.7658826         |
| Sr | 3.6542550         | 3.6542550         | 3.6542550         |
| O  | 3.6949401         | <u>1.3100490</u>  | 3.6949401         |
| Sr | 3.7658826         | -1.2563008        | 3.7658826         |
| O  | 3.5813948         | -3.5813948        | 3.5813948         |
| Sr | -3.6542550        | -3.6542550        | 3.6542550         |
| O  | -3.6949401        | <u>-1.3100490</u> | 3.6949401         |
| Sr | -3.7658826        | 1.2563008         | 3.7658826         |
| O  | -3.5813948        | 3.5813948         | 3.5813948         |
| Sr | -3.7658826        | 3.7658826         | 1.2563008         |
| O  | -3.6949401        | 3.6949401         | <u>-1.3100490</u> |
| O  | -3.7830932        | 1.2855187         | 1.2855187         |
| Sr | -3.8472054        | 1.2405094         | -1.2405094        |
| Sr | -3.8472054        | -1.2405094        | 1.2405094         |
| O  | -3.7830932        | -1.2855187        | -1.2855187        |
| O  | -3.6949401        | -3.6949401        | <u>1.3100490</u>  |
| Sr | -3.7658826        | -3.7658826        | -1.2563008        |
| Sr | -3.6542550        | 3.6542550         | -3.6542550        |
| O  | -3.6949401        | <u>1.3100490</u>  | -3.6949401        |
| Sr | -3.7658826        | -1.2563008        | -3.7658826        |
| O  | -3.5813948        | -3.5813948        | -3.5813948        |
| Sr | 3.6542550         | -3.6542550        | -3.6542550        |
| O  | 3.6949401         | <u>-1.3100490</u> | -3.6949401        |
| Sr | 3.7658826         | 1.2563008         | -3.7658826        |
| O  | 3.5813948         | 3.5813948         | -3.5813948        |
| O  | <u>1.3100490</u>  | -3.6949401        | -3.6949401        |
| Sr | 1.2405094         | -1.2405094        | -3.8472054        |
| O  | 1.2855187         | 1.2855187         | -3.7830932        |
| Sr | 1.2563008         | 3.7658826         | -3.7658826        |
| Sr | -1.2563008        | -3.7658826        | -3.7658826        |
| O  | -1.2855187        | -1.2855187        | -3.7830932        |

|    |                   |            |                   |
|----|-------------------|------------|-------------------|
| Sr | -1.2405094        | 1.2405094  | -3.8472054        |
| O  | <u>-1.3100490</u> | 3.6949401  | -3.6949401        |
| O  | 3.6949401         | -3.6949401 | <u>-1.3100490</u> |
| Sr | 3.8472054         | -1.2405094 | -1.2405094        |
| O  | 3.7830932         | 1.2855187  | -1.2855187        |
| Sr | 3.7658826         | 3.7658826  | -1.2563008        |
| Sr | 3.7658826         | -3.7658826 | 1.2563008         |
| O  | 3.7830932         | -1.2855187 | 1.2855187         |
| Sr | 3.8472054         | 1.2405094  | 1.2405094         |
| O  | 3.6949401         | 3.6949401  | <u>1.3100490</u>  |
| Sr | 1.2405094         | -3.8472054 | -1.2405094        |
| O  | 1.2855187         | -3.7830932 | 1.2855187         |
| O  | -1.2855187        | -3.7830932 | -1.2855187        |
| Sr | -1.2405094        | -3.8472054 | 1.2405094         |
| O  | 1.2869855         | -1.2869855 | -1.2869855        |
| Sr | 1.2628302         | -1.2628302 | 1.2628302         |
| Sr | -1.2628302        | -1.2628302 | -1.2628302        |
| O  | -1.2869855        | -1.2869855 | 1.2869855         |
| Sr | 1.2628302         | 1.2628302  | -1.2628302        |
| O  | 1.2869855         | 1.2869855  | 1.2869855         |
| O  | -1.2869855        | 1.2869855  | -1.2869855        |
| Sr | -1.2628302        | 1.2628302  | 1.2628302         |
| O  | 1.2855187         | 3.7830932  | -1.2855187        |
| Sr | 1.2405094         | 3.8472054  | 1.2405094         |
| Sr | -1.2405094        | 3.8472054  | -1.2405094        |
| O  | -1.2855187        | 3.7830932  | 1.2855187         |

**Table S13** *BHLYP optimised structure for (MgS)<sub>32</sub>.*

|    |            |            |            |
|----|------------|------------|------------|
| Mg | -1.3424995 | 3.6592294  | 3.6592294  |
| S  | 1.2006144  | 3.8887317  | 3.8887317  |
| S  | -1.2202980 | 1.2202980  | 3.9671802  |
| Mg | 1.3005829  | 1.3005829  | 3.7733457  |
| Mg | -1.3005829 | -1.3005829 | 3.7733457  |
| S  | 1.2202980  | -1.2202980 | 3.9671802  |
| S  | -1.2006144 | -3.8887317 | 3.8887317  |
| Mg | 1.3424995  | -3.6592294 | 3.6592294  |
| Mg | 3.4951385  | 3.4951385  | 3.4951385  |
| S  | 3.8887317  | 1.2006144  | 3.8887317  |
| Mg | 3.6592294  | -1.3424995 | 3.6592294  |
| S  | 3.7786735  | -3.7786735 | 3.7786735  |
| Mg | -3.4951385 | -3.4951385 | 3.4951385  |
| S  | -3.8887317 | -1.2006144 | 3.8887317  |
| Mg | -3.6592294 | 1.3424995  | 3.6592294  |
| S  | -3.7786735 | 3.7786735  | 3.7786735  |
| Mg | -3.6592294 | 3.6592294  | 1.3424995  |
| S  | -3.8887317 | 3.8887317  | -1.2006144 |
| S  | -3.9671802 | 1.2202980  | 1.2202980  |
| Mg | -3.7733457 | 1.3005829  | -1.3005829 |
| Mg | -3.7733457 | -1.3005829 | 1.3005829  |
| S  | -3.9671802 | -1.2202980 | -1.2202980 |
| S  | -3.8887317 | -3.8887317 | 1.2006144  |
| Mg | -3.6592294 | -3.6592294 | -1.3424995 |
| Mg | -3.4951385 | 3.4951385  | -3.4951385 |
| S  | -3.8887317 | 1.2006144  | -3.8887317 |
| Mg | -3.6592294 | -1.3424995 | -3.6592294 |
| S  | -3.7786735 | -3.7786735 | -3.7786735 |

|    |            |            |            |
|----|------------|------------|------------|
| Mg | 3.4951385  | -3.4951385 | -3.4951385 |
| S  | 3.8887317  | -1.2006144 | -3.8887317 |
| Mg | 3.6592294  | 1.3424995  | -3.6592294 |
| S  | 3.7786735  | 3.7786735  | -3.7786735 |
| S  | 1.2006144  | -3.8887317 | -3.8887317 |
| Mg | 1.3005829  | -1.3005829 | -3.7733457 |
| S  | 1.2202980  | 1.2202980  | -3.9671802 |
| Mg | 1.3424995  | 3.6592294  | -3.6592294 |
| Mg | -1.3424995 | -3.6592294 | -3.6592294 |
| S  | -1.2202980 | -1.2202980 | -3.9671802 |
| Mg | -1.3005829 | 1.3005829  | -3.7733457 |
| S  | -1.2006144 | 3.8887317  | -3.8887317 |
| S  | 3.8887317  | -3.8887317 | -1.2006144 |
| Mg | 3.7733457  | -1.3005829 | -1.3005829 |
| S  | 3.9671802  | 1.2202980  | -1.2202980 |
| Mg | 3.6592294  | 3.6592294  | -1.3424995 |
| Mg | 3.6592294  | -3.6592294 | 1.3424995  |
| S  | 3.9671802  | -1.2202980 | 1.2202980  |
| Mg | 3.7733457  | 1.3005829  | 1.3005829  |
| S  | 3.8887317  | 3.8887317  | 1.2006144  |
| Mg | 1.3005829  | -3.7733457 | -1.3005829 |
| S  | 1.2202980  | -3.9671802 | 1.2202980  |
| S  | -1.2202980 | -3.9671802 | -1.2202980 |
| Mg | -1.3005829 | -3.7733457 | 1.3005829  |
| S  | 1.2564784  | -1.2564784 | -1.2564784 |
| Mg | 1.3085941  | -1.3085941 | 1.3085941  |
| Mg | -1.3085941 | -1.3085941 | -1.3085941 |
| S  | -1.2564784 | -1.2564784 | 1.2564784  |
| Mg | 1.3085941  | 1.3085941  | -1.3085941 |
| S  | 1.2564784  | 1.2564784  | 1.2564784  |
| S  | -1.2564784 | 1.2564784  | -1.2564784 |
| Mg | -1.3085941 | 1.3085941  | 1.3085941  |
| S  | 1.2202980  | 3.9671802  | -1.2202980 |
| Mg | 1.3005829  | 3.7733457  | 1.3005829  |
| Mg | -1.3005829 | 3.7733457  | -1.3005829 |
| S  | -1.2202980 | 3.9671802  | 1.2202980  |

**Table S14** *BHLYP Optimised structure for (MgSe)<sub>32</sub>.*

|    |            |            |            |
|----|------------|------------|------------|
| Mg | -1.4353564 | 3.8317213  | 3.8317213  |
| Se | 1.2585890  | 4.1162969  | 4.1162969  |
| Se | -1.2781548 | 1.2781548  | 4.2064929  |
| Mg | 1.3945905  | 1.3945905  | 3.9554740  |
| Mg | -1.3945905 | -1.3945905 | 3.9554740  |
| Se | 1.2781548  | -1.2781548 | 4.2064929  |
| Se | -1.2585890 | -4.1162969 | 4.1162969  |
| Mg | 1.4353564  | -3.8317213 | 3.8317213  |
| Mg | 3.6580732  | 3.6580732  | 3.6580732  |
| Se | 4.1162969  | 1.2585890  | 4.1162969  |
| Mg | 3.8317213  | -1.4353564 | 3.8317213  |
| Se | 4.0010859  | -4.0010859 | 4.0010859  |
| Mg | -3.6580732 | -3.6580732 | 3.6580732  |
| Se | -4.1162969 | -1.2585890 | 4.1162969  |
| Mg | -3.8317213 | 1.4353564  | 3.8317213  |
| Se | -4.0010859 | 4.0010859  | 4.0010859  |
| Mg | -3.8317213 | 3.8317213  | 1.4353564  |
| Se | -4.1162969 | 4.1162969  | -1.2585890 |

|    |            |            |            |
|----|------------|------------|------------|
| Se | -4.2064929 | 1.2781548  | 1.2781548  |
| Mg | -3.9554740 | 1.3945905  | -1.3945905 |
| Mg | -3.9554740 | -1.3945905 | 1.3945905  |
| Se | -4.2064929 | -1.2781548 | -1.2781548 |
| Se | -4.1162969 | -4.1162969 | 1.2585890  |
| Mg | -3.8317213 | -3.8317213 | -1.4353564 |
| Mg | -3.6580732 | 3.6580732  | -3.6580732 |
| Se | -4.1162969 | 1.2585890  | -4.1162969 |
| Mg | -3.8317213 | -1.4353564 | -3.8317213 |
| Se | -4.0010859 | -4.0010859 | -4.0010859 |
| Mg | 3.6580732  | -3.6580732 | -3.6580732 |
| Se | 4.1162969  | -1.2585890 | -4.1162969 |
| Mg | 3.8317213  | 1.4353564  | -3.8317213 |
| Se | 4.0010859  | 4.0010859  | -4.0010859 |
| Se | 1.2585890  | -4.1162969 | -4.1162969 |
| Mg | 1.3945905  | -1.3945905 | -3.9554740 |
| Se | 1.2781548  | 1.2781548  | -4.2064929 |
| Mg | 1.4353564  | 3.8317213  | -3.8317213 |
| Mg | -1.4353564 | -3.8317213 | -3.8317213 |
| Se | -1.2781548 | -1.2781548 | -4.2064929 |
| Mg | -1.3945905 | 1.3945905  | -3.9554740 |
| Se | -1.2585890 | 4.1162969  | -4.1162969 |
| Se | 4.1162969  | -4.1162969 | -1.2585890 |
| Mg | 3.9554740  | -1.3945905 | -1.3945905 |
| Se | 4.2064929  | 1.2781548  | -1.2781548 |
| Mg | 3.8317213  | 3.8317213  | -1.4353564 |
| Mg | 3.8317213  | -3.8317213 | 1.4353564  |
| Se | 4.2064929  | -1.2781548 | 1.2781548  |
| Mg | 3.9554740  | 1.3945905  | 1.3945905  |
| Se | 4.1162969  | 4.1162969  | 1.2585890  |
| Mg | 1.3945905  | -3.9554740 | -1.3945905 |
| Se | 1.2781548  | -4.2064929 | 1.2781548  |
| Se | -1.2781548 | -4.2064929 | -1.2781548 |
| Mg | -1.3945905 | -3.9554740 | 1.3945905  |
| Se | 1.3151707  | -1.3151707 | -1.3151707 |
| Mg | 1.4014159  | -1.4014159 | 1.4014159  |
| Mg | -1.4014159 | -1.4014159 | -1.4014159 |
| Se | -1.3151707 | -1.3151707 | 1.3151707  |
| Mg | 1.4014159  | 1.4014159  | -1.4014159 |
| Se | 1.3151707  | 1.3151707  | 1.3151707  |
| Se | -1.3151707 | 1.3151707  | -1.3151707 |
| Mg | -1.4014159 | 1.4014159  | 1.4014159  |
| Se | 1.2781548  | 4.2064929  | -1.2781548 |
| Mg | 1.3945905  | 3.9554740  | 1.3945905  |
| Mg | -1.3945905 | 3.9554740  | -1.3945905 |
| Se | -1.2781548 | 4.2064929  | 1.2781548  |

**Table S15** *BHLYP* optimised structure for  $(\text{CdO})_{32}$ .

|    |            |            |            |
|----|------------|------------|------------|
| Cd | -1.1313432 | -3.4130673 | -3.4130673 |
| O  | 1.0869686  | -3.4290084 | -3.4290084 |
| O  | -1.1196131 | -1.1196131 | -3.5120904 |
| Cd | 1.1126827  | -1.1126827 | -3.5227343 |
| Cd | -1.1126827 | 1.1126827  | -3.5227343 |
| O  | 1.1196131  | 1.1196131  | -3.5120904 |
| O  | -1.0869686 | 3.4290084  | -3.4290084 |
| Cd | 1.1313432  | 3.4130673  | -3.4130673 |
| Cd | 3.2382884  | -3.2382884 | -3.2382884 |

O 3.4290084 -1.0869686 -3.4290084  
Cd 3.4130673 1.1313432 -3.4130673  
O 3.2804441 3.2804441 -3.2804441  
Cd -3.2382884 3.2382884 -3.2382884  
O -3.4290084 1.0869686 -3.4290084  
Cd -3.4130673 -1.1313432 -3.4130673  
O -3.2804441 -3.2804441 -3.2804441  
Cd -3.4130673 -3.4130673 -1.1313432  
O -3.4290084 -3.4290084 1.0869686  
O -3.5120904 -1.1196131 -1.1196131  
Cd -3.5227343 -1.1126827 1.1126827  
Cd -3.5227343 1.1126827 -1.1126827  
O -3.5120904 1.1196131 1.1196131  
O -3.4290084 3.4290084 -1.0869686  
Cd -3.4130673 3.4130673 1.1313432  
Cd -3.2382884 -3.2382884 3.2382884  
O -3.4290084 -1.0869686 3.4290084  
Cd -3.4130673 1.1313432 3.4130673  
O -3.2804441 3.2804441 3.2804441  
Cd 3.2382884 3.2382884 3.2382884  
O 3.4290084 1.0869686 3.4290084  
Cd 3.4130673 -1.1313432 3.4130673  
O 3.2804441 -3.2804441 3.2804441  
O 1.0869686 3.4290084 3.4290084  
Cd 1.1126827 1.1126827 3.5227343  
O 1.1196131 -1.1196131 3.5120904  
Cd 1.1313432 -3.4130673 3.4130673  
Cd -1.1313432 3.4130673 3.4130673  
O -1.1196131 1.1196131 3.5120904  
Cd -1.1126827 -1.1126827 3.5227343  
O -1.0869686 -3.4290084 3.4290084  
O 3.4290084 3.4290084 1.0869686  
Cd 3.5227343 1.1126827 1.1126827  
O 3.5120904 -1.1196131 1.1196131  
Cd 3.4130673 -3.4130673 1.1313432  
Cd 3.4130673 3.4130673 -1.1313432  
O 3.5120904 1.1196131 -1.1196131  
Cd 3.5227343 -1.1126827 -1.1126827  
O 3.4290084 -3.4290084 -1.0869686  
Cd 1.1126827 3.5227343 1.1126827  
O 1.1196131 3.5120904 -1.1196131  
O -1.1196131 3.5120904 1.1196131  
Cd -1.1126827 3.5227343 -1.1126827  
O 1.1633164 1.1633164 1.1633164  
Cd 1.1451857 1.1451857 -1.1451857  
Cd -1.1451857 1.1451857 1.1451857  
O -1.1633164 1.1633164 -1.1633164  
Cd 1.1451857 -1.1451857 1.1451857  
O 1.1633164 -1.1633164 -1.1633164  
O -1.1633164 -1.1633164 1.1633164  
Cd -1.1451857 -1.1451857 -1.1451857  
O 1.1196131 -3.5120904 1.1196131  
Cd 1.1126827 -3.5227343 -1.1126827  
Cd -1.1126827 -3.5227343 1.1126827  
O -1.1196131 -3.5120904 -1.1196131



**Table S16** *BHLYP Optimised structure for (PbS)<sub>32</sub>.*

|    |            |            |            |
|----|------------|------------|------------|
| Pb | -1.7937790 | -4.5123516 | -4.5123516 |
| S  | 1.7852788  | -4.5005900 | -4.5005900 |
| S  | -1.7797764 | -1.7797764 | -4.4934626 |
| Pb | 1.7650475  | -1.7650475 | -4.5640431 |
| Pb | -1.7650475 | 1.7650475  | -4.5640431 |
| S  | 1.7797764  | 1.7797764  | -4.4934626 |
| S  | -1.7852788 | 4.5005900  | -4.5005900 |
| Pb | 1.7937790  | 4.5123516  | -4.5123516 |
| Pb | 4.4801322  | -4.4801322 | -4.4801322 |
| S  | 4.5005900  | -1.7852788 | -4.5005900 |
| Pb | 4.5123516  | 1.7937790  | -4.5123516 |
| S  | 4.4942644  | 4.4942644  | -4.4942644 |
| Pb | -4.4801322 | 4.4801322  | -4.4801322 |
| S  | -4.5005900 | 1.7852788  | -4.5005900 |
| Pb | -4.5123516 | -1.7937790 | -4.5123516 |
| S  | -4.4942644 | -4.4942644 | -4.4942644 |
| Pb | -4.5123516 | -4.5123516 | -1.7937790 |
| S  | -4.5005900 | -4.5005900 | 1.7852788  |
| S  | -4.4934626 | -1.7797764 | -1.7797764 |
| Pb | -4.5640431 | -1.7650475 | 1.7650475  |
| Pb | -4.5640431 | 1.7650475  | -1.7650475 |
| S  | -4.4934626 | 1.7797764  | 1.7797764  |
| S  | -4.5005900 | 4.5005900  | -1.7852788 |
| Pb | -4.5123516 | 4.5123516  | 1.7937790  |
| Pb | -4.4801322 | -4.4801322 | 4.4801322  |
| S  | -4.5005900 | -1.7852788 | 4.5005900  |
| Pb | -4.5123516 | 1.7937790  | 4.5123516  |
| S  | -4.4942644 | 4.4942644  | 4.4942644  |
| Pb | 4.4801322  | 4.4801322  | 4.4801322  |
| S  | 4.5005900  | 1.7852788  | 4.5005900  |
| Pb | 4.5123516  | -1.7937790 | 4.5123516  |
| S  | 4.4942644  | -4.4942644 | 4.4942644  |
| S  | 1.7852788  | 4.5005900  | 4.5005900  |
| Pb | 1.7650475  | 1.7650475  | 4.5640431  |
| S  | 1.7797764  | -1.7797764 | 4.4934626  |
| Pb | 1.7937790  | -4.5123516 | 4.5123516  |
| Pb | -1.7937790 | 4.5123516  | 4.5123516  |
| S  | -1.7797764 | 1.7797764  | 4.4934626  |
| Pb | -1.7650475 | -1.7650475 | 4.5640431  |
| S  | -1.7852788 | -4.5005900 | 4.5005900  |
| S  | 4.5005900  | 4.5005900  | 1.7852788  |
| Pb | 4.5640431  | 1.7650475  | 1.7650475  |
| S  | 4.4934626  | -1.7797764 | 1.7797764  |
| Pb | 4.5123516  | -4.5123516 | 1.7937790  |
| Pb | 4.5123516  | 4.5123516  | -1.7937790 |
| S  | 4.4934626  | 1.7797764  | -1.7797764 |
| Pb | 4.5640431  | -1.7650475 | -1.7650475 |
| S  | 4.5005900  | -4.5005900 | -1.7852788 |
| Pb | 1.7650475  | 4.5640431  | 1.7650475  |
| S  | 1.7797764  | 4.4934626  | -1.7797764 |
| S  | -1.7797764 | 4.4934626  | 1.7797764  |
| Pb | -1.7650475 | 4.5640431  | -1.7650475 |
| S  | 1.7900869  | 1.7900869  | 1.7900869  |
| Pb | 1.7205072  | 1.7205072  | -1.7205072 |
| Pb | -1.7205072 | 1.7205072  | 1.7205072  |
| S  | -1.7900869 | 1.7900869  | -1.7900869 |
| Pb | 1.7205072  | -1.7205072 | 1.7205072  |

S 1.7900869 -1.7900869 -1.7900869  
S -1.7900869 -1.7900869 1.7900869  
Pb -1.7205072 -1.7205072 -1.7205072  
S 1.7797764 -4.4934626 1.7797764  
Pb 1.7650475 -4.5640431 -1.7650475  
Pb -1.7650475 -4.5640431 1.7650475  
S -1.7797764 -4.4934626 -1.7797764
